# Supplementary material for: Serum response factor, a novel early diagnostic biomarker of acute kidney injury
Source: publisher site journal article supplement (doi:10.18632/aging.202381), 2021-01-05
Supplement: Supplementary file [file aging-v13i2-202381-supplementary-material-SD1.pdf]

## SUPPLEMENTARY FIGURES

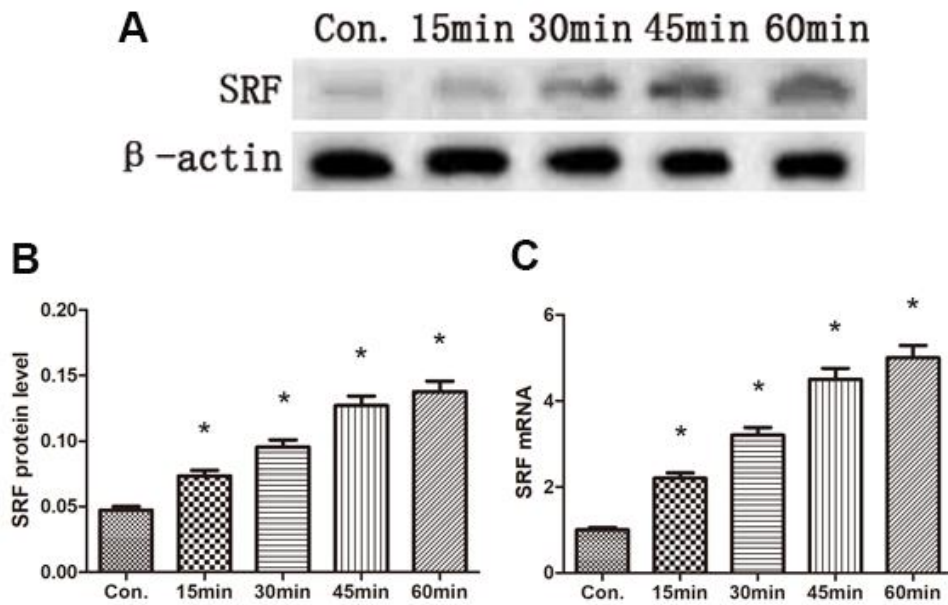

**Supplementary Figure 1. SRF protein and mRNA expression was upregulated with the extension of renal pedicles occlusion time. (A, B) The protein and (C) mRNA expression of SRF at 6h after different renal pedicles occlusion time. Data were expressed as the mean  $\pm$  SE (N = 7 rats per group). \* $P$  < 0.05 versus control group.**
